# Supplementary material
Source: PubMed Central journal article supplement (PMC7322630)
Supplement: NIHMS1601482-supplement-Supp_Material.pdf [file NIHMS1601482-supplement-Supp_Material.pdf]

## Supplemental Figure Legends

**Supplemental Figure 1. Functional expression of TRPV4 in mouse CF** Average Calcium transients and quantitative analysis of relative changes ( $\Delta F/F_0$ ) in calcium influx in isolated mCF from WT and TRPV4KO mice loaded with Fluo-4 and stimulated with TRPV4 specific activator, GSK1016790A either untreated or treated with TRPV4 antagonist, AB159908 (WT+AB1). Note: Cells were pre-treated for 20 minutes with TRPV4 antagonist before stimulating with TRPV4 agonist. Arrow indicates the time at which TRPV4 agonist added to cells ( $F/F_0$  = ratio of fluorescence intensity relative to time 0). The data presented are mean  $\pm$  SEM of three separate experiments. Student's t-test. Significance was set at \*\*\* $p \leq 0.001$ .

**Supplemental Figure 2. Pharmacological activation of TRPV4 induced calcium in mouse CF.**

Representative calcium traces depicting calcium influx in response to specific TRPV4 agonist GSK1016790A (GSK) and ATP in Fura-2 loaded mCF. A) GSK induced calcium influx in WT-mCF which was abolished with the addition of TRPV4 antagonist, AB1. Note that ATP induced calcium influx in these cells. B) GSK failed to induce calcium influx in TRPV4KO-mCF while ATP induced robust calcium influx. C) Quantitative analysis of relative changes in calcium influx ( $\Delta 340/380$ ) in WT and TRPV4KO mCF. The data presented are mean  $\pm$  SEM of three separate experiments. Student's t-test. Significance was set at \* $p \leq 0.05$ .

**Supplemental Figure 3. TGF- $\beta$ 1 induced CF differentiation in mCF shown with the**

**expression of EDA-fibronectin.** Representative immunofluorescence images showing expression of EDA-FN (green) in response to TGF- $\beta$ 1 in WT and TRPV4KO mCF on ECM gels of varying stiffness (0.2, 8, 50 kPa). Scale bar= 10  $\mu$ m. Nuclei: DAPI (Blue). The data presented are mean  $\pm$  SEM of three separate experiments.

**Supplemental Figure 4. TGF- $\beta$ 1 is failed to induce MRTF-A activation in TRPV4KO mCF.**

Representative immunofluorescence images (20X) showing MRTF-A expression and localization (green) in TRPV4KO-mCF in response to TGF- $\beta$ 1 (10 ng/ml). Note that TGF- $\beta$ 1 stimulation did not increase MRTF-A expression or nuclear translocation. Quantitative analysis of MRTF-A activation (cytosolic levels and nuclear translocation).

**Supplemental Figure 5. Knock down of MRTF-A using MRTF-A specific siRNAs. WT-mCFs**

were transfected with control and MRTF-A specific siRNAs using siLentiFect and cells were lysed 48 h after transfection to extract RNA. qPCR (A) and western blot (B) analysis of MRTF-A expression in control and MRTF-A knocked down cells. The data presented are mean  $\pm$  SEM of three separate experiments. Student's t-test. Significance was set at \* $p \leq 0.05$ ; \*\* $p \leq 0.01$ .

**Supplemental Figure 6. MRTF-A inhibitor does not affect TGF- $\beta$ 1-induced Rho kinase**

**activity in WT mCF.** Rho kinase activity was measured in the presence or absence of MRTF-A antagonist CCG1423 after stimulation with TGF- $\beta$ 1. The data presented are mean  $\pm$  SEM of three separate experiments. CCG1423 treatment alone has no effect on basal Rho kinase activity. Student's t-test. Significance was set at \* $p \leq 0.05$ .

**Supplemental Figure 7. RT-PCR analysis of TRPV4 expression in WT and TRPV4KO mCF.**

Full images of PCR agarose gel electrophoresis (Fig.3A) showing the expression of TRPV4 and GAPDH in WT and TRPV4KO mCF. M=100 bp DNA ladder.

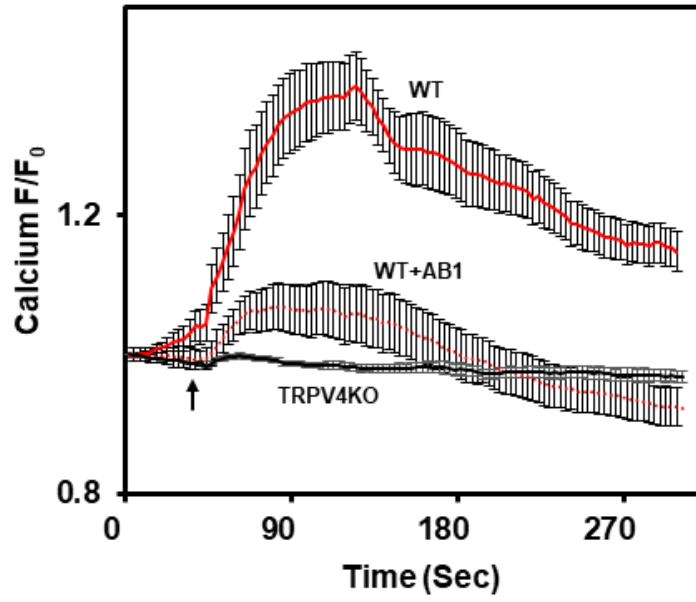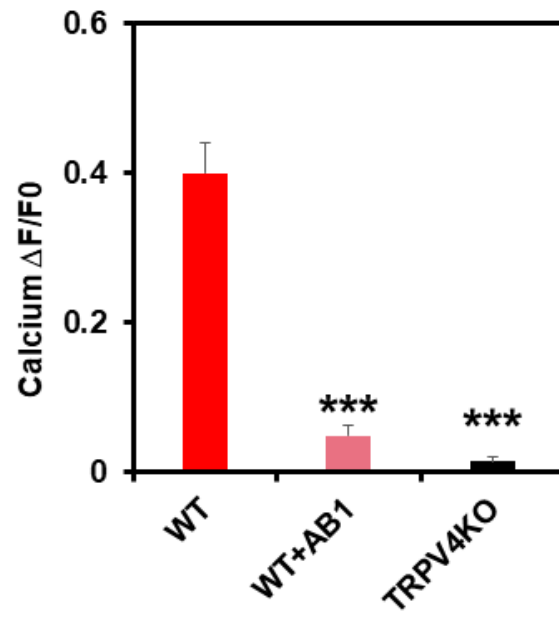

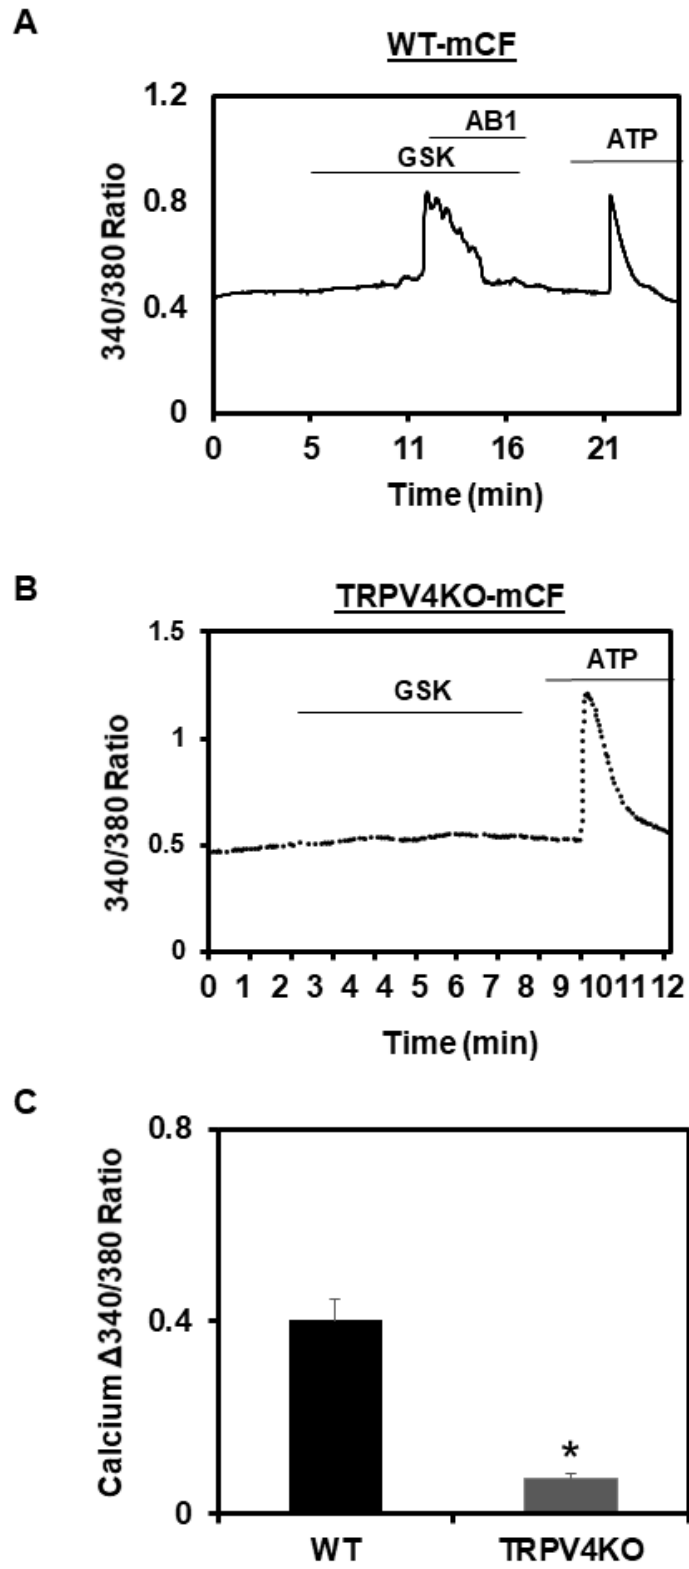

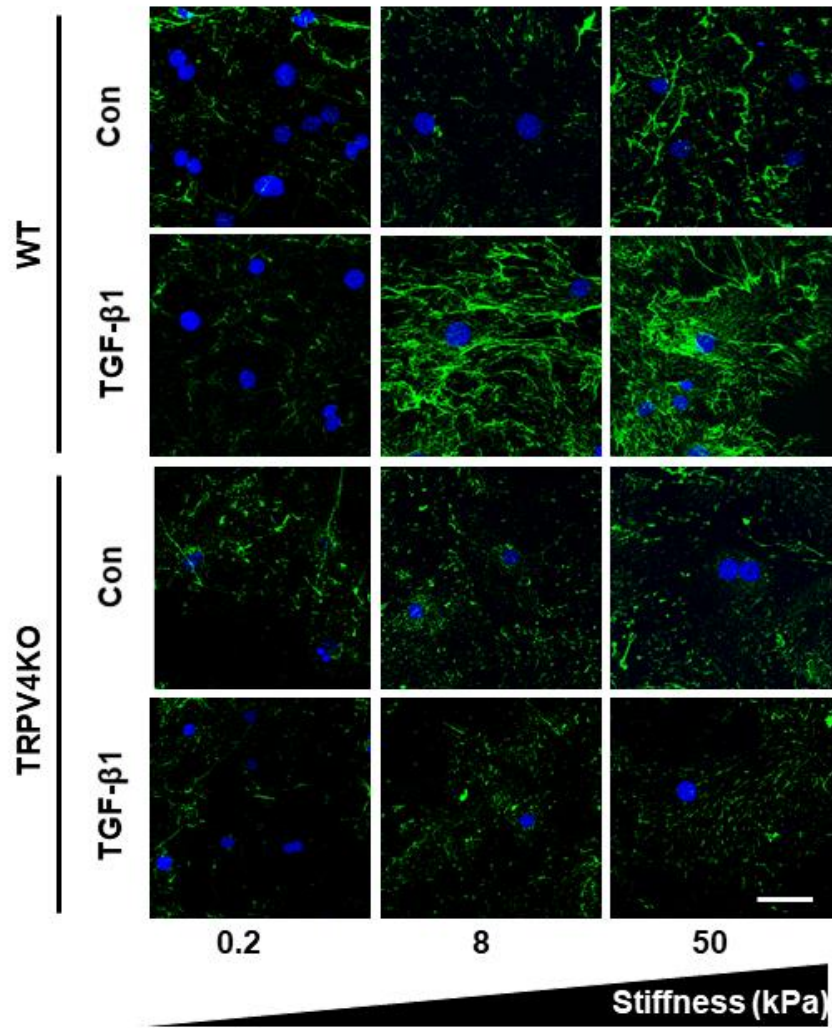

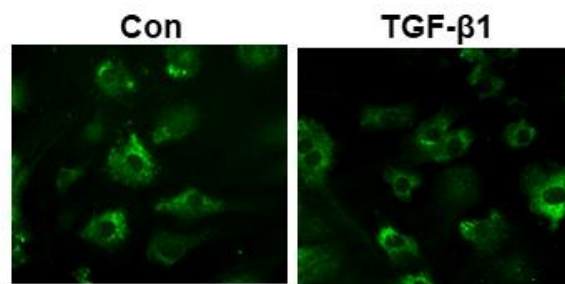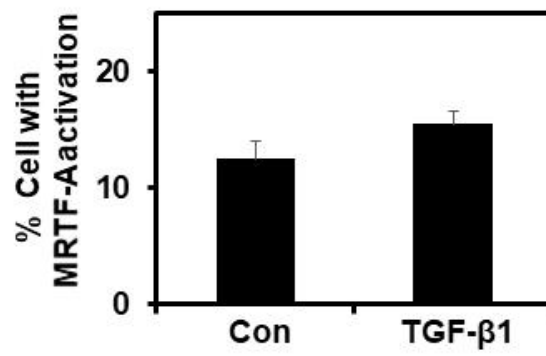

**A**

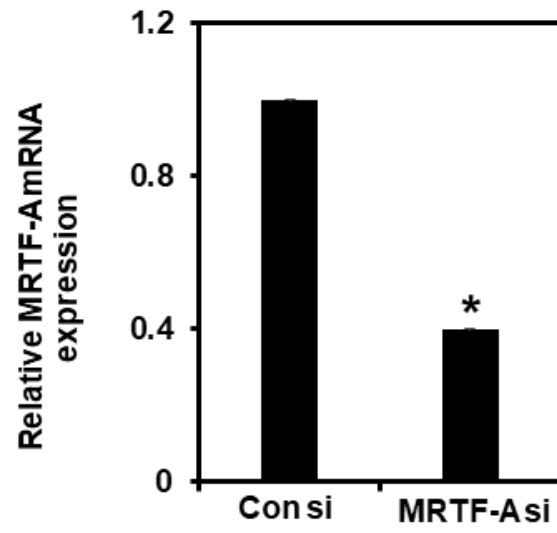

**B**

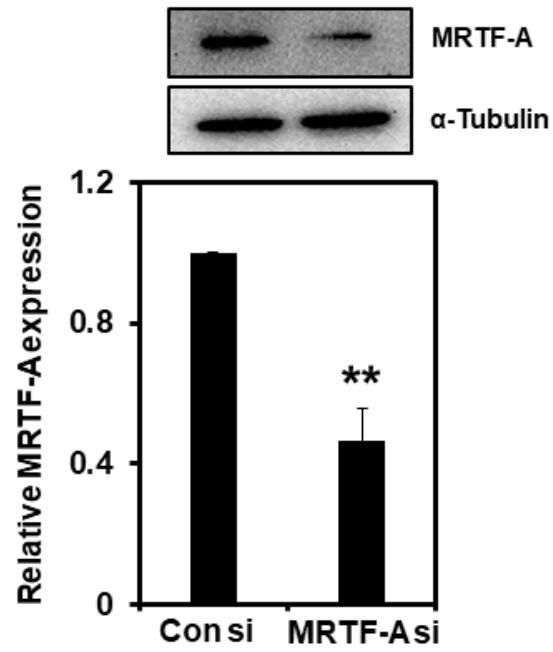

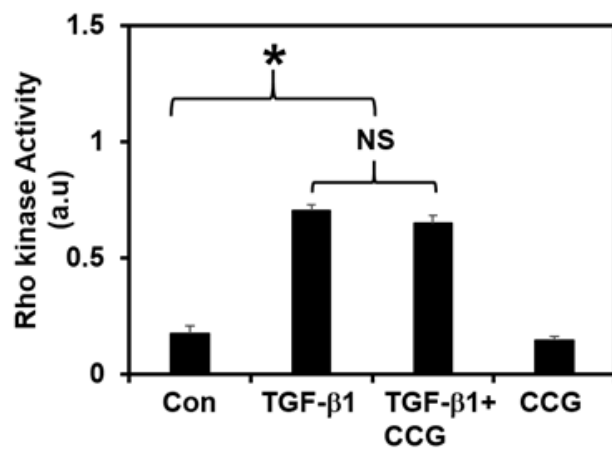



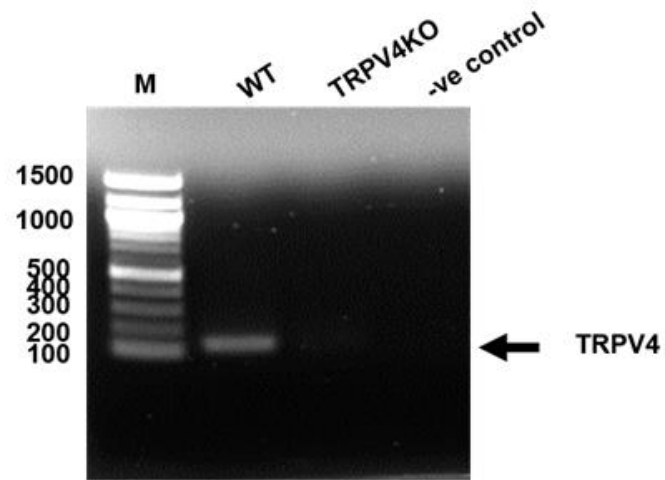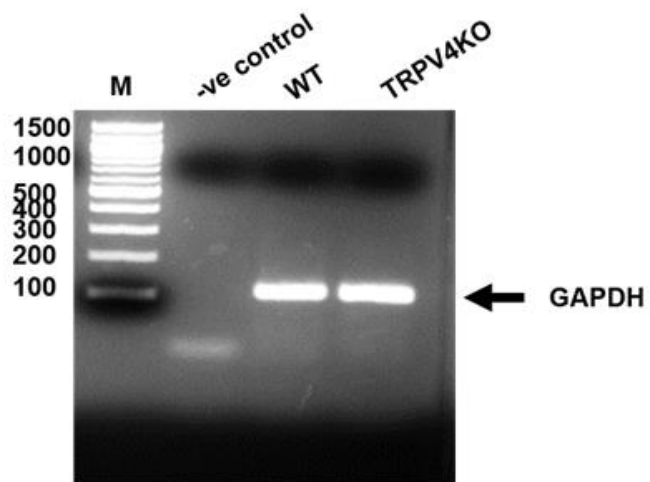

Adapala et al., Supplementary Fig. 7
